# Supplementary material for: Brazilian Table Olives: A Source of Lactic Acid Bacteria with Antimycotoxigenic and Antifungal Activity
Source: MDPI journal article supplement (doi:10.3390/toxins15010071), 2023-01-13
Supplement: s1 [file s1]

Supplement

# Brazilian Table Olives: A Source of Lactic Acid Bacteria with Antimycotoxigenic and Antifungal Activity

Luara Simões <sup>1,2</sup>, Natália Fernandes <sup>1,3</sup>, José Teixeira <sup>4,5</sup>, Luís Abrunhosa <sup>4,5,\*</sup> and Disney Ribeiro Dias <sup>6,\*</sup>

<sup>1</sup> Biology Department, Federal University of Lavras, Lavras 37200-900, Brazil

<sup>2</sup> Centre of Molecular and Environmental Biology, University of Minho, 4710-057 Braga, Portugal

<sup>3</sup> Chemistry Department, University of California, 95616 Davis, CA, USA

<sup>4</sup> CEB—Centre of Biological Engineering, University of Minho, 4710-057 Braga, Portugal

<sup>5</sup> LABBELS—Associate Laboratory, Braga/Guimarães, Portugal

<sup>6</sup> Department of Food Science, Federal University of Lavras, Lavras 37200-900, Brazil

\* Correspondence: d3024@deb.uminho.pt (L.A.); diasdr@ufla.br (D.R.D.);

Tel.: +351-253-601-986 (L.A.); +55(35)3829-5256 (D.R.D.)

**Table S1.** Lactic acid bacteria isolated from table olives used in this study (n = 14).

| Species                                                     | N° of isolates | Code     | Isolation: cultivar and fermentation time |
|-------------------------------------------------------------|----------------|----------|-------------------------------------------|
| <i>Levilactobacillus brevis</i>                             | 3              | CCMA1762 | Ascolano (time 120 days)                  |
|                                                             |                | CCMA1765 | Ascolano (fresh fruit)                    |
|                                                             |                | CCMA1766 | Ascolano (time 60 days)                   |
| <i>Lactocaseibacillus paracasei</i> subsp. <i>paracasei</i> | 10             | CCMA1763 | Ascolano (time 120 days)                  |
|                                                             |                | CCMA1764 | Ascolano (time 60 days)                   |
|                                                             |                | CCMA1767 | Ascolano (time 30 days)                   |
|                                                             |                | CCMA1769 | Ascolano (time 120 days)                  |
|                                                             |                | CCMA1770 | Grappolo (time 60 days)                   |
|                                                             |                | CCMA1771 | Grappolo (fresh fruit)                    |
|                                                             |                | CCMA1772 | Ascolano (time 60 days)                   |
|                                                             |                | CCMA1773 | Ascolano (fresh fruit)                    |
|                                                             |                | CCMA1774 | Grappolo (time 120 days)                  |
|                                                             |                | CCMA1775 | Grappolo (time 30 days)                   |
| <i>Lactiplantibacillus pentosus</i>                         | 1              | CCMA1768 | Ascolano (time 120 days)                  |

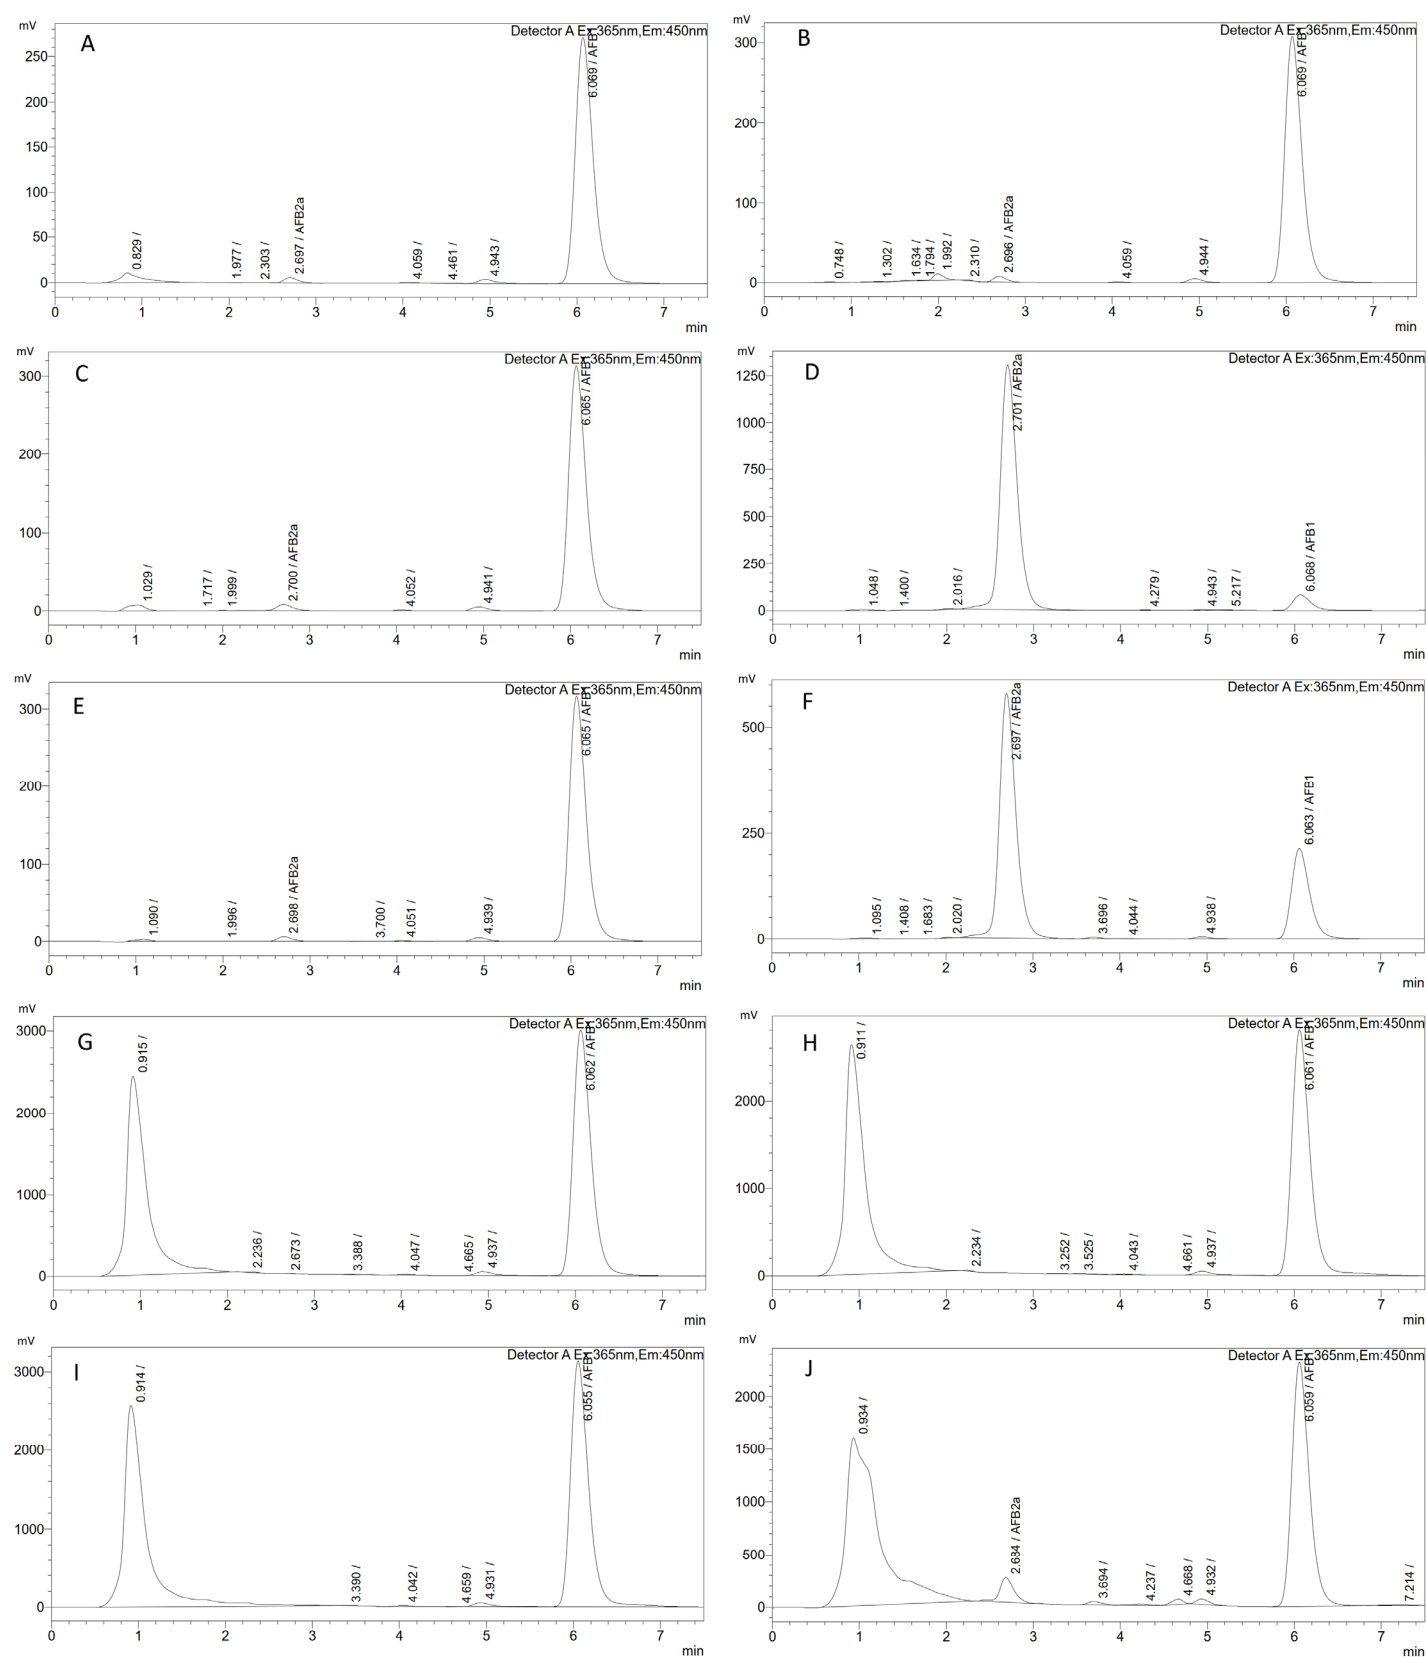

**Figure S1.** Example of obtained chromatograms of AFB1 biotransformation into AFB2a. **(A)** water sample – day 0; **(B)** water sample – day 12; **(C)** 0.1 M lactic acid – day 0; **(D)** 0.1 M lactic acid – day 12; **(E)** 0.1 M acetic acid – day 0; **(F)** 0.1 M acetic acid – day 12; **(G)** MRS-broth – day 0; **(H)** MRS-broth – day 12; **(I)** LAB CCMA1764 in MRS-broth – day 0; **(J)** LAB CCMA1764 in MRS-broth – day 12.
